# Supplementary material for: Tetracarbonate melts and the fate of primordial carbon in the deep Earth
Source: Research Square preprint supplement (doi:10.21203/rs.3.rs-294216/v1), 2021-05-13
Supplement: Supplementary file 2 [file 46ff4c3ea89b1e660c9141fa.docx]

**Supplementary Information for**

Tetracarbonate melts and the fate of primordial carbon in the deep Earth

Valerio Cerantola1,2*, Christoph J. Sahle2, Sylvain Petitgirard3,4, Min Wu5, Stefano Checchia2, Christopher Weis6, Marco Di Michiel2, Gavin B. M. Vaughan2, Ines E. Collings2, Róbert Arató4,7, Max Wilke8, Adrian P. Jones9, Michael Hanfland2, John S. Tse10

Correspondence to: valerio.cerantola@xfel.eu

**This file includes**

Supplementary Text:

1. Structural evolution and compaction mechanisms of K2MgCO3 from 1 bar to 115 GPa.
2. Carbon isotopic content in hotspots volcanism
3. Subducted carbon contribution to the thermochemical piles

References

**1. Structural evolution and compaction mechanisms of K2MgCO3 from 1bar to 115 GPa**

At ambient conditions, the glass structure is characterized by two distinct structural populations of carbonate ions. The first, more symmetrical unit, strongly interacts with bridging Mg2+ cations, and the second, more distorted, bonds to non-bridging K+ 47,48. Via ionic bonding Mg2+ and CO32- form a flexible framework structure, which is supported by K atoms sitting in the voids of networking rings47. Upon pressure increase, compression dominates the structural behavior of the glass. Below ~45 GPa the compression mechanism is mostly due to collapsing of void spaces around the K atoms, 0 – 10 GPa, and compressional rearrangement of the medium range ordered structure, owing to the high flexibility and distortion acceptance of the carbonate ions, 10-45 GPa. The fast collapse of the void spaces around the K atoms is visible from the high shift-rate in the position of the FSDP towards higher reciprocal space values (Å-1) (Extended Data Fig. 5). Radial distribution function (RDF) calculations indicate that the major contributions for FSDP and SSDP are K-O, O-O and Mg-O, O-O respectively. Moreover, an initial compaction of the glass seems to be complementary to the structural evolution observed in the crystalline counterpart46, with K2Mg(CO3)2 crystal stable in trigonal *R-3m* space group up to ~8 GPa, where it transforms into a monoclinic (*C2/m*) polymorph. The topology of the high-pressure polymorph is similar to the low-pressure one, but with a significant distortion of the structural elements, in particular the carbonate ions46. For both crystalline and glass K2Mg(CO3)2, the polyhedron of the bigger cation, K+, is more compressible than the polyhedron containing Mg2+ (Extended Data Fig. 8). In the glass, the fast compression around K atoms allows the C-O bond to rearrange in a wide variety of bond lengths, between 1.09 - 1.40 Å, which evidences the distortion accepted by the carbonate group. Molecular dynamic simulations48 on liquid K2Mg(CO3)2 also show distorted carbonate units with the carbon atom moving out of plane, in line with the observed changes in the XRS spectra between ambient and 10 GPa, where the loss of D3h symmetry results in a drop of the *π**  resonance intensity. However, the most notable changes in response to compression are observed between K-O ions. As the pressure increases, the bond length shifts to significant lower values, from 2.85(1) Å at 1 bar to 2.47(1) Å at 46 GPa (Table 1, Extended Data Fig. 8), however showing a significant stiffening of the bond above that pressure, which we interpret as a change in the role of potassium, to act as network-former ion.

The increase of C-O distance and the disappearance of the *π**-resonance between ~45 and ~85 GPa, is due to the transition from *sp2* to *sp3* hybridized carbon, where the resonant *sp* double bond in the planar CO3-unit is broken via the formation of an additional covalent bond and thus a transition from planar CO3- to tetrahedral CO4-units. A strong change in the glass structure around 40 GPa is also detected from the position of the FSDP and SSDP of the S(*Q*) (Extended Data Fig. 5). In the pressure region around 40 GPa the shifts of FSDP and SSDP with pressure flatten, then jump to higher values at > 50 GPa following a different compressional regime. These observations reflect strong underlying changes in the carbonate ion structure, their flexibility determining the response of the system at high pressures.

Above 85 GPa, we observe the onset of a fully polymerized network structure. The gain in spectral O K-edge weight in the high energy loss region (> 550 eV, Fig. 1A,B) is concomitant with the second compaction seen in the C-O atomic distances in the PDFs. The intensity increase in the *σ** resonance indicates the formation of new covalent bonds between oxygens and surrounding cations, and it has been observed also in silicates after the increase on coordination number (CN)49. Due to the strong compression of the C-O distances above 85 GPa, and the monotonic compression of K-O bonds above ~46 GPa, we expect the increase of coordination environment to happen around Mg2+-cations, i.e. [Mg]CN 7+ 18. The wide range of C-O distances measured at 104(4) GPa, ~0.98–1.42 Å (the peak at 1.193(3) Å), is an indication of at least one CO4 population strongly distorted, and probably the remanence of highly compressed CO3-units. The presence of (C2O7)6- dimers, trimers and possibly highly polymerized oxy-carbon complexes was also observed by AIMD simulations (Extended Data Fig. 7, Methods). We highlight that the role of K+ and Mg2+ at these extreme pressure can only be of bridging species since the Coulombic interactions are much stronger due to the 1) higher electrostatic charge of the tetracarbonate unit and 2) the much smaller atomic radius of the cations compared to uncompressed material.

**2. Carbon isotopic content in hotspot volcanism**

There are three distinct ranges of carbon isotopic compositions that provide information on the possible carbon source:

1. “light” carbon (ca. 𝛿13C < -20 ‰), from either biogenic or abiogenic non carbonate origin, coming from surface or near-surface environments.
2. isotopically “heavier” carbon (ca. -8 ‰ < 𝛿13C < -2 ‰, avg. ~5‰) has been identified as a common isotopic composition signature for the mantle (carbonatite and kimberlite carbonates, diamonds and volcanic CO2 exhalations), thus material of more primitive origin.
3. “carbonate” carbon (ca. 𝛿13C > - 2 ‰), typical of surface-derived carbon deposited as carbonate from seawater.

The carbon isotopic contents in minerals, glasses and gases collected at hotspots location all indicate a deep mantle origin, with 𝛿13C values oscillating in average around -2.5 ± 1.1 ‰ in Iceland50, between −7 ‰ and -2.4 ‰ in Hawaii51 and around -6 ‰ in Pitcairn hot spot52, just to cite a few. The concomitant presence of light 𝛿13C (< 20 ‰) was measured in all these studies and should not surprise, since it is often associated to graphitic and organic material at the surface (known to be present virtually in all cracks), or could be caused by melt-crust interaction, involving a low δ13C component.

Nevertheless, it is important to highlight that the isotopic signature of ocean island basalts shows that hotspots’ mantle sources can be diverse and heterogeneous, reflecting their derivation from distinct reservoirs within the convecting mantle and consisting of numerous geochemically distinct components with varied origins and evolutions*53-56*.

The Deep mantle origin of material erupted via hotspots volcanism is also indirectly confirmed by emission measurements of other noble gases, i.e. 40K, 40Ar and Xe, present in the mantle plumes and released at hotspots locations. Their isotopic composition and abundance suggest that they come from a very poorly degassed region of the mantle57,58, which remained relatively unperturbed during the late stage of Earth’s accretion history.

**3. Subducted carbon contribution to the thermochemical piles**

In the contribution of subducted material that accumulate in the thermochemical piles, it is conceivable to expect that some amount of carbon, remnants of the carbonate layers constituting the old oceanic crust, should be present. Indeed, the most recent estimations indicate that only about 30% of the subducted carbon is to be recycled in the crust and atmosphere8, and even if the associated uncertainties are very large, it is to be expected that at least some of the remaining carbon (in the form of carbonates or other C-carriers) may be transported with the oceanic crust further down, ultimately reaching the CMB and thermochemical regions associated with the LLVPs. Thus, subducted carbon could be present, in a small part, as oxidized species in the proximity of ancient slabs even at the reducing conditions of the Earth’s lower mantle, and could form carbon-rich domains where tetracarbonate melts or crystalline could exist.

**References**

47. Genge, M. J., Jones, A. P. & Price, G. D. An infrared and Raman study of carbonate glasses: Implications for the structure of carbonatite magmas. *Geochimica et Cosmochimica* Acta **5**, 927-937 (1995).

48. Wilding, M. C. et al. The structure and thermochemistry of K2CO3–MgCO3 glass. *Journal of Material Research* **34**, 3377-3388 (2019).

49. Petitgirard, S. et al. Magma properties at deep Earth’s conditions from electronic structure of silica. *Geochemical Perspectives Letters* **9**, 32-37 (2019).

50. Barry, P. H., Hilton, D. R., Füri, E., Halldórsson, S. A. & Grönvold, K. Carbon isotope and abundance systematics of Icelandic geothermal gases, fluids and subglacial basalts with implications for mantle plume-related CO2 fluxes. *Geochimica et Cosmochimica Acta* **134,** 74-99 (2014).

51. Pineau, Y. F. & Mathez, E. A. Carbon isotopes in xenoliths from the Hualalai Volcano, Hawaii, and the generation of isotopic variability. *Geochimica et Cosmochimica Acta* **54**, 217-227 (1990).

52. Aubaud, C., Pineau, F., Hékinian, R. & Javoy, M. Carbon and hydrogen isotope constraints on degassing of CO2 and H2O in submarine lavas from the Pitcairn hotspot (South Pacific). *Geophysical Research Letters* **33**, 2 (2006).

53. Hart, S. R. A large-scale isotope anomaly in the Southern Hemisphere mantle. *Nature* **309**, 753–757 (1984).

54. Hofmann, A. W. Chemical differentiation of the Earth: the relationship between mantle, continental crust, and oceanic crust. *Earth and Planetary Science Letters*. **90**, 297–314 (1988).

55. Deines, P. The carbon isotope geochemistry of mantle xenoliths. *Earth Science Review* **58**, 247-278 (2002).

56. Walker, M. J. et al. Deep Mantle Cycling of Oceanic Crust: Evidence from Diamonds and Their Mineral Inclusions. *Science* **334**, 54-57 (2011).

57. Marty, B. The origins and concentrations of water, carbon, nitrogen and noble gases on Earth. *Earth and Planetary Science Let*ters **313-314**, 56-66 (2012).

58. Parai, R., Mukhopadhyay, S., Tucker, J. M. & Pető, M. K. The emerging portrait of an ancient, heterogeneous and continuously evolving mantle plume source. *Lithos* **346-347**, 105153 (2019).
